# Supplementary material for: Sulfonylurea Use in Patients with Type 2 Diabetes and COPD: A Nationwide Population-Based Cohort Study
Source: MDPI journal article supplement (doi:10.3390/ijerph192215013), 2022-11-15
Supplement: s1 [file s1]

**Table S1.** Diseases and related ICD-9-CM, ICD-10-CM codes.

| Disease                               | ICD-9-CM codes                                                                             | ICD-10-CM codes                                                                                                                                                                                                |
|---------------------------------------|--------------------------------------------------------------------------------------------|----------------------------------------------------------------------------------------------------------------------------------------------------------------------------------------------------------------|
| Type 2 diabetes                       | 250.xx, except 250.1x                                                                      | E11                                                                                                                                                                                                            |
| Type 1 diabetes                       | 250.1x                                                                                     | E10                                                                                                                                                                                                            |
| Dialysis                              | V56.0, V56.8, V45.1                                                                        | Z49.31, Z49.32, Z99.2                                                                                                                                                                                          |
| Hepatic failure                       | 570, 572.2, 572.4, 572.8                                                                   | K72.00, K72.01, K72.10, K72.11, K72.90, K76.2, K72.90, K72.91, K76.7, K76.81                                                                                                                                   |
| Obesity                               | 278.02, 783.1, V85.2, 278.00, 649.1, V77.8, V85.3, 278.01, 649.2, V45.86, V85.4            | R63.5, E66.09, E66.1, E66.8, E66.9, Z13.89, E66.01, E66.2                                                                                                                                                      |
| Smoking status                        | 305.1, 649.0, V15.82                                                                       | F17.200, F17.201, F17.210, F17.220, F17.221, F17.290, F17.291, Z87.891                                                                                                                                         |
| Alcohol-related disorders             | 291, 303, 305.0, 571.0-571.3, V11.3, V79.1                                                 | F10, K70.40, K70.41, K70.9                                                                                                                                                                                     |
| Hypertension                          | 401-405, A26                                                                               | I10, I11, I12, I13, I15, N26                                                                                                                                                                                   |
| Dyslipidemia                          | 272                                                                                        | E71.30, E71.31, E71.32, E71.39, E75.21, E75.22, E75.23, E75.24, E75.25, E75.29, E75.3, E75.4, E75.5, E75.6, E77, E78.0, E78.1, E78.2, E78.3, E78.4, E78.5, E78.6, E78.70, E78.71, E78.72, E78.79, E78.8, E78.9 |
| Coronary artery disease               | 410-414                                                                                    | I20, I21, I22, I24, I25.1, I25.2, I25.3, I25.4, I25.5, I25.6, I25.7, I25.81, I25.82, I25.83, I25.84, I25.89, I25.9                                                                                             |
| Stroke                                | 430-438                                                                                    | G45.0, G45.1, G45.2, G45.3, G45.4, G45.8, G45.9, G46, I60, I61, I62, I63, I65, I66, I67.0, I67.1, I67.2, I67.3, I67.4, I67.5, I67.6, I67.7, I67.8, I67.9, I68, I69                                             |
| Heart failure                         | 398.91, 402.01, 402.11, 402.91, 404.01, 404.03, 404.11, 404.13, 404.91, 404.93, 428, 429.4 | I09.81, I11.0, I13.0, I13.2, I50, I97.0, I97.110, I97.111, I97.120, I97.121, I97.130, I97.131, I97.190, I97.191                                                                                                |
| Peripheral arterial disease           | 440.0, 440.20, 440.21, 440.22, 440.23, 440.24, 440.3, 440.4, 443.9, 443.81, 443.89         | I70.2, I70.92, I75.0, I73.9                                                                                                                                                                                    |
| Chronic obstructive pulmonary disease | 491, 492, or 496                                                                           | J41, J42, J44, J43, or J44.9                                                                                                                                                                                   |

|                                            |                                                                                                                                                                  |                                                                                                                                                                                    |
|--------------------------------------------|------------------------------------------------------------------------------------------------------------------------------------------------------------------|------------------------------------------------------------------------------------------------------------------------------------------------------------------------------------|
| Chronic kidney disease                     | 250.4x, 403.xx, 404.xx, 585.xx, 586.xx, 581.8x, 791.0x, 593.9x, V42.0x, V45.1x, V56.0x, V56.8x, 39.27, 39.42, 39.43, 39.49, 39.50, 39.53, 39.93, 39.94, or 39.95 | E10.2, E10.65, E11.2, E11.65, E13.2, I12, I13, N03, N08, E10.21, E11.21, N05, N06, N07, N14, N15.0, N15.8, N15.9, N16, N17.1, N17.2, N18, N19, Z94.0, Z49.31, Z49.32, Z99.2, Z94.0 |
| Liver cirrhosis                            | 571.5, 571.2, 571.6                                                                                                                                              | K70.2, K70.30, K70.31, K74.0, K74.1, K74.2, K74.60, K74.69, K74.3, K74.4, K74.5                                                                                                    |
| Lung cancer                                | 162.0, 162.2, 162.3, 162.4, 162.5, 162.8, 162.9                                                                                                                  | C34.00-C34.92                                                                                                                                                                      |
| Non-invasive positive pressure ventilation | 93.90, 93.91                                                                                                                                                     | Z99.81                                                                                                                                                                             |
| Invasive mechanical ventilation            | 96.7                                                                                                                                                             | Z99.1                                                                                                                                                                              |
| Bacterial pneumonia                        | 480-486                                                                                                                                                          | J12-18                                                                                                                                                                             |
| Hypoglycemia                               | 251.0x, 251.1x, or 251.2x                                                                                                                                        | E16.0, E16.1, E16.2                                                                                                                                                                |

Table S2. Hazard ratios (HRs) and 95% confidence intervals (CIs) for death among the sampled patients.

| Variables      | T2D without sulfonylureas |       |        | T2D with sulfonylureas |       |       | cHR  | (95% CI)     | p-value | aHR <sup>†</sup> | (95% CI)     | p-value |
|----------------|---------------------------|-------|--------|------------------------|-------|-------|------|--------------|---------|------------------|--------------|---------|
|                | Event                     | PY    | IR     | Event                  | PY    | IR    |      |              |         |                  |              |         |
| Sex            |                           |       |        |                        |       |       |      |              |         |                  |              |         |
| Female         | 541                       | 17071 | 31.69  | 366                    | 20144 | 18.17 | 0.58 | (0.51, 0.66) | <0.001  | 0.55             | (0.48, 0.63) | <0.001  |
| Male           | 739                       | 16746 | 44.13  | 522                    | 20493 | 25.47 | 0.58 | (0.52, 0.65) | <0.001  | 0.51             | (0.45, 0.57) | <0.001  |
| Age (years)    |                           |       |        |                        |       |       |      |              |         |                  |              |         |
| 40-49          | 73                        | 4908  | 14.87  | 56                     | 4632  | 12.09 | 0.82 | (0.58, 1.16) | 0.2608  | 0.6              | (0.41, 0.87) | 0.0072  |
| 50-59          | 252                       | 12792 | 19.70  | 197                    | 15487 | 12.72 | 0.66 | (0.54, 0.79) | <0.001  | 0.58             | (0.48, 0.7)  | <0.001  |
| 60-59          | 394                       | 9955  | 39.58  | 264                    | 12873 | 20.51 | 0.52 | (0.45, 0.61) | <0.001  | 0.47             | (0.4, 0.55)  | <0.001  |
| 70-80          | 561                       | 6162  | 91.04  | 371                    | 7645  | 48.53 | 0.52 | (0.45, 0.59) | <0.001  | 0.51             | (0.44, 0.58) | <0.001  |
| Obesity        |                           |       |        |                        |       |       |      |              |         |                  |              |         |
| No             | 1270                      | 33085 | 38.39  | 883                    | 39745 | 22.22 | 0.58 | (0.53, 0.63) | <0.001  | 0.53             | (0.48, 0.58) | <0.001  |
| Yes            | 10                        | 732   | 13.66  | 5                      | 892   | 5.61  | 0.41 | (0.14, 1.19) | 0.1004  | 0.26             | (0.02, 3.85) | 0.3309  |
| Smoking status |                           |       |        |                        |       |       |      |              |         |                  |              |         |
| No             | 1265                      | 33366 | 37.91  | 881                    | 40081 | 21.98 | 0.58 | (0.53, 0.64) | <0.001  | 0.53             | (0.48, 0.58) | <0.001  |
| Yes            | 15                        | 450   | 33.30  | 7                      | 556   | 12.60 | 0.37 | (0.15, 0.92) | 0.0314  | 0.11             | (0.02, 0.52) | 0.0058  |
| CCI            |                           |       |        |                        |       |       |      |              |         |                  |              |         |
| 0              | 680                       | 26745 | 25.42  | 518                    | 30892 | 16.77 | 0.67 | (0.6, 0.75)  | <0.001  | 0.6              | (0.53, 0.67) | <0.001  |
| 1              | 185                       | 3653  | 50.65  | 116                    | 4609  | 25.17 | 0.49 | (0.39, 0.62) | <0.001  | 0.47             | (0.36, 0.6)  | <0.001  |
| ≥2             | 415                       | 3418  | 121.40 | 254                    | 5136  | 49.45 | 0.4  | (0.34, 0.47) | <0.001  | 0.44             | (0.37, 0.52) | <0.001  |
| DCSI           |                           |       |        |                        |       |       |      |              |         |                  |              |         |
| 0              | 347                       | 13891 | 24.98  | 297                    | 15570 | 19.08 | 0.77 | (0.66, 0.9)  | <0.001  | 0.61             | (0.52, 0.72) | <0.001  |
| 1              | 207                       | 7499  | 27.60  | 135                    | 8550  | 15.79 | 0.58 | (0.47, 0.72) | <0.001  | 0.55             | (0.44, 0.69) | <0.001  |
| ≥2             | 726                       | 12426 | 58.42  | 456                    | 16517 | 27.61 | 0.47 | (0.42, 0.53) | <0.001  | 0.47             | (0.42, 0.53) | <0.001  |
| OAD numbers    |                           |       |        |                        |       |       |      |              |         |                  |              |         |
| 0-1            | 875                       | 26205 | 33.39  | 738                    | 32074 | 23.01 | 0.69 | (0.63, 0.76) | <0.001  | 0.58             | (0.53, 0.65) | <0.001  |
| 2-3            | 375                       | 7078  | 52.98  | 141                    | 8335  | 16.92 | 0.32 | (0.27, 0.39) | <0.001  | 0.35             | (0.28, 0.42) | <0.001  |

|         |     |       |       |     |       |       |      |              |        |      |              |        |
|---------|-----|-------|-------|-----|-------|-------|------|--------------|--------|------|--------------|--------|
| >3      | 30  | 533   | 56.25 | 9   | 228   | 39.45 | 0.73 | (0.35, 1.54) | 0.4074 | 0.23 | (0.07, 0.81) | 0.0222 |
| Insulin |     |       |       |     |       |       |      |              |        |      |              |        |
| No      | 704 | 22276 | 31.60 | 554 | 25940 | 21.36 | 0.68 | (0.61, 0.76) | <0.001 | 0.59 | (0.53, 0.66) | <0.001 |
| Yes     | 576 | 11541 | 49.91 | 334 | 14697 | 22.73 | 0.46 | (0.4, 0.52)  | <0.001 | 0.44 | (0.39, 0.51) | <0.001 |

T2D: type 2 diabetes; PY: person-years; IR: incidence rate, per 1,000 person-years; cHR, crude hazard ratio; aHR: adjusted hazard ratio; CCI, Charlson Comorbidity Index; DCSI, Diabetes Complication Severity Index. OAD, oral antidiabetic drug.

aHR †: multivariable analysis, including sex, age, comorbidities, medications as shown in Table 1.

**Table S3.** Hazard ratios (HRs), and 95% confidence intervals (CIs) for cardiovascular events among the sampled patients.

| Variables      | T2D without sulfonylureas |       |       | T2D with sulfonylureas |       |       | cHR  | (95% CI)     | p-value | aHR <sup>†</sup> | (95% CI)     | p-value |
|----------------|---------------------------|-------|-------|------------------------|-------|-------|------|--------------|---------|------------------|--------------|---------|
|                | Event                     | PY    | IR    | Event                  | PY    | IR    |      |              |         |                  |              |         |
| Sex            |                           |       |       |                        |       |       |      |              |         |                  |              |         |
| Female         | 426                       | 15526 | 27.44 | 468                    | 18053 | 25.92 | 0.94 | (0.83, 1.07) | 0.3631  | 0.86             | (0.75, 0.98) | 0.0224  |
| Male           | 546                       | 15052 | 36.27 | 650                    | 17769 | 36.58 | 1    | (0.9, 1.12)  | 0.9479  | 0.89             | (0.79, 1)    | 0.0497  |
| Age (years)    |                           |       |       |                        |       |       |      |              |         |                  |              |         |
| 40-49          | 68                        | 4643  | 14.65 | 91                     | 4149  | 21.93 | 1.5  | (1.09, 2.05) | 0.0119  | 1.14             | (0.81, 1.61) | 0.4444  |
| 50-59          | 213                       | 11976 | 17.79 | 312                    | 14087 | 22.15 | 1.25 | (1.05, 1.49) | 0.0122  | 1.11             | (0.93, 1.33) | 0.2379  |
| 60-59          | 329                       | 8784  | 37.45 | 358                    | 11291 | 31.71 | 0.84 | (0.72, 0.98) | 0.0225  | 0.78             | (0.67, 0.91) | 0.0019  |
| 70-80          | 362                       | 5174  | 69.96 | 357                    | 6295  | 56.71 | 0.8  | (0.69, 0.93) | 0.0028  | 0.78             | (0.67, 0.91) | 0.0015  |
| Obesity        |                           |       |       |                        |       |       |      |              |         |                  |              |         |
| No             | 956                       | 29892 | 31.98 | 1099                   | 35011 | 31.39 | 0.98 | (0.9, 1.07)  | 0.5961  | 0.88             | (0.81, 0.96) | 0.0051  |
| Yes            | 16                        | 686   | 23.34 | 19                     | 811   | 23.43 | 1.03 | (0.53, 2)    | 0.9335  | 1.22             | (0.55, 2.74) | 0.6249  |
| Smoking status |                           |       |       |                        |       |       |      |              |         |                  |              |         |
| No             | 958                       | 30156 | 31.77 | 1101                   | 35323 | 31.17 | 0.98 | (0.9, 1.06)  | 0.592   | 0.88             | (0.81, 0.96) | 0.0045  |
| Yes            | 14                        | 422   | 33.18 | 17                     | 499   | 34.04 | 1.03 | (0.51, 2.1)  | 0.9249  | 0.98             | (0.35, 2.79) | 0.9758  |
| CCI            |                           |       |       |                        |       |       |      |              |         |                  |              |         |
| 0              | 560                       | 24666 | 22.70 | 697                    | 27812 | 25.06 | 1.1  | (0.99, 1.23) | 0.0825  | 1                | (0.9, 1.13)  | 0.9337  |
| 1              | 156                       | 3155  | 49.44 | 173                    | 3859  | 44.83 | 0.89 | (0.72, 1.11) | 0.3086  | 0.76             | (0.6, 0.95)  | 0.0161  |
| ≥2             | 256                       | 2756  | 92.87 | 248                    | 4150  | 59.75 | 0.65 | (0.55, 0.78) | <0.001  | 0.73             | (0.61, 0.87) | <0.001  |
| DCSI           |                           |       |       |                        |       |       |      |              |         |                  |              |         |
| 0              | 237                       | 13127 | 18.05 | 300                    | 14337 | 20.92 | 1.16 | (0.98, 1.38) | 0.0857  | 1.06             | (0.89, 1.26) | 0.532   |
| 1              | 145                       | 6963  | 20.83 | 178                    | 7779  | 22.88 | 1.1  | (0.88, 1.37) | 0.4108  | 1.03             | (0.82, 1.29) | 0.794   |
| ≥2             | 590                       | 10488 | 56.26 | 640                    | 13705 | 46.70 | 0.82 | (0.74, 0.92) | <0.001  | 0.78             | (0.7, 0.88)  | <0.001  |
| OAD numbers    |                           |       |       |                        |       |       |      |              |         |                  |              |         |
| 0-1            | 658                       | 23975 | 27.45 | 863                    | 28283 | 30.51 | 1.11 | (1, 1.23)    | 0.0481  | 0.96             | (0.87, 1.07) | 0.4695  |

|         |     |       |       |     |       |       |      |              |        |      |              |        |
|---------|-----|-------|-------|-----|-------|-------|------|--------------|--------|------|--------------|--------|
| 2-3     | 290 | 6125  | 47.35 | 247 | 7339  | 33.66 | 0.7  | (0.59, 0.83) | <0.001 | 0.71 | (0.6, 0.85)  | <0.001 |
| >3      | 24  | 477   | 50.30 | 8   | 201   | 39.87 | 0.8  | (0.36, 1.78) | 0.5802 | 0.94 | (0.32, 2.77) | 0.9099 |
| Insulin |     |       |       |     |       |       |      |              |        |      |              |        |
| No      | 557 | 20360 | 27.36 | 672 | 23127 | 29.06 | 1.06 | (0.95, 1.19) | 0.3105 | 0.93 | (0.83, 1.04) | 0.2251 |
| Yes     | 415 | 10218 | 40.62 | 446 | 12695 | 35.13 | 0.86 | (0.75, 0.98) | 0.0278 | 0.82 | (0.71, 0.94) | 0.0043 |

T2D: type 2 diabetes; PY: person-years; IR: incidence rate, per 1,000 person-years; cHR, crude hazard ratio; aHR: adjusted hazard ratio; CCI, Charlson Comorbidity Index; DCSI, Diabetes Complication Severity Index. OAD, oral antidiabetic drug.

aHR <sup>†</sup>: multivariable analysis including sex, age, comorbidities, medications as shown in Table 1.

**Table S4.** Hazard ratios (HRs), and 95% confidence intervals (CIs) for non-invasive positive pressure ventilation among the sampled patients.

| Variables   | T2D without sulfonylureas |       |       | T2D with sulfonylureas |       |      | cHR (95% CI)      | p-value | aHR <sup>†</sup> (95% CI) | p-value |
|-------------|---------------------------|-------|-------|------------------------|-------|------|-------------------|---------|---------------------------|---------|
|             | Event                     | PY    | IR    | Event                  | PY    | IR   |                   |         |                           |         |
| Sex         |                           |       |       |                        |       |      |                   |         |                           |         |
| Female      | 93                        | 16931 | 5.49  | 80                     | 19988 | 4.00 | 0.74 (0.55, 1)    | 0.0528  | 0.72 (0.53, 0.98)         | 0.0394  |
| Male        | 87                        | 16642 | 5.23  | 93                     | 20315 | 4.58 | 0.87 (0.65, 1.17) | 0.3515  | 0.74 (0.54, 1)            | 0.049   |
| Age (years) |                           |       |       |                        |       |      |                   |         |                           |         |
| 40-49       | 11                        | 4870  | 2.26  | 6                      | 4608  | 1.30 | 0.58 (0.21, 1.58) | 0.2869  | 0.39 (0.13, 1.2)          | 0.1022  |
| 50-59       | 27                        | 12761 | 2.12  | 38                     | 15415 | 2.47 | 1.21 (0.74, 1.99) | 0.4406  | 1.09 (0.65, 1.82)         | 0.7512  |
| 60-59       | 57                        | 9869  | 5.78  | 61                     | 12741 | 4.79 | 0.86 (0.6, 1.24)  | 0.4238  | 0.87 (0.6, 1.28)          | 0.4785  |
| 70-79       | 85                        | 6074  | 14.00 | 68                     | 7540  | 9.02 | 0.61 (0.44, 0.84) | 0.0023  | 0.58 (0.41, 0.8)          | 0.001   |
| Obesity     |                           |       |       |                        |       |      |                   |         |                           |         |

|                |     |       |       |     |       |      |                   |        |                   |        |
|----------------|-----|-------|-------|-----|-------|------|-------------------|--------|-------------------|--------|
| No             | -   | -     |       | -   | -     |      | 0.81 (0.66, 1)    | 0.0553 | 0.75 (0.6, 0.93)  | 0.0079 |
| Yes            | -   | -     |       | -   | -     |      | 0.44 (0.04, 4.89) | 0.5054 | -                 | -      |
| Smoking status |     |       |       |     |       |      |                   |        |                   |        |
| No             | -   | -     |       | -   | -     |      | 0.82 (0.66, 1.01) | 0.0625 | 0.75 (0.61, 0.94) | 0.0102 |
| Yes            | -   | -     |       | -   | -     |      | 0.41 (0.08, 2.26) | 0.3071 | -                 | -      |
| CCI            |     |       |       |     |       |      |                   |        |                   |        |
| 0              | 102 | 26585 | 3.84  | 101 | 30706 | 3.29 | 0.88 (0.67, 1.16) | 0.3677 | 0.8 (0.61, 1.07)  | 0.1309 |
| 1              | 27  | 3631  | 7.44  | 28  | 4546  | 6.16 | 0.83 (0.49, 1.41) | 0.4928 | 0.8 (0.45, 1.45)  | 0.4661 |
| ≥2             | 51  | 3357  | 15.19 | 44  | 5051  | 8.71 | 0.54 (0.36, 0.81) | 0.003  | 0.65 (0.43, 1)    | 0.0506 |
| DCSI           |     |       |       |     |       |      |                   |        |                   |        |
| 0              | 42  | 13834 | 3.04  | 53  | 15480 | 3.42 | 1.14 (0.76, 1.71) | 0.5263 | 0.99 (0.65, 1.52) | 0.9745 |
| 1              | 21  | 7470  | 2.81  | 32  | 8487  | 3.77 | 1.41 (0.81, 2.44) | 0.2256 | 1.2 (0.67, 2.14)  | 0.5424 |

|             |     |       |      |     |       |      |                   |        |                   |        |
|-------------|-----|-------|------|-----|-------|------|-------------------|--------|-------------------|--------|
| ≥2          | 117 | 12269 | 9.54 | 88  | 16337 | 5.39 | 0.56 (0.43, 0.74) | <0.001 | 0.56 (0.42, 0.75) | <0.001 |
| OAD numbers |     |       |      |     |       |      |                   |        |                   |        |
| 0-1         | -   | -     | 4.30 | -   | -     | 4.34 | 1.01 (0.79, 1.3)  | 0.9204 | 0.88 (0.68, 1.14) | 0.3441 |
| 2-3         | -   | -     | 9.00 | -   | -     | 4.12 | 0.48 (0.31, 0.73) | <0.001 | 0.47 (0.31, 0.73) | <0.001 |
| >3          | -   | -     | 9.43 | -   | -     | 4.38 | 0.48 (0.06, 4.12) | 0.5023 | -                 | -      |
| Insulin     |     |       |      |     |       |      |                   |        |                   |        |
| No          | 101 | 22115 | 4.57 | 101 | 25772 | 3.92 | 0.88 (0.67, 1.16) | 0.3714 | 0.77 (0.58, 1.03) | 0.0744 |
| Yes         | 79  | 11458 | 6.89 | 72  | 14531 | 4.95 | 0.7 (0.51, 0.97)  | 0.0317 | 0.72 (0.52, 1)    | 0.053  |

---

T2D: type 2 diabetes; PY: person-years; IR: incidence rate, per 1,000 person-years; cHR, crude hazard ratio; aHR: adjusted hazard ratio; CCI, Charlson Comorbidity Index; DCSI, Diabetes Complication Severity Index. OAD, oral antidiabetic drug.

aHR <sup>†</sup>: multivariable analysis including sex, age, comorbidities, medications as shown in Table 1.



|                |     |       |       |     |       |       |                   |        |                   |        |
|----------------|-----|-------|-------|-----|-------|-------|-------------------|--------|-------------------|--------|
| No             | 502 | 32590 | 15.40 | 386 | 39136 | 9.86  | 0.64 (0.56, 0.73) | <0.001 | 0.62 (0.54, 0.7)  | <0.001 |
| Yes            | 3   | 722   | 4.15  | 3   | 891   | 3.37  | 0.83 (0.17, 4.13) | 0.8205 | 0.44 (0.03, 6.04) | 0.5356 |
| Smoking status |     |       |       |     |       |       |                   |        |                   |        |
| No             | 496 | 32875 | 15.09 | 383 | 39491 | 9.70  | 0.64 (0.56, 0.73) | <0.001 | 0.58 (0.5, 0.66)  | <0.001 |
| Yes            | 9   | 438   | 20.55 | 6   | 536   | 11.20 | 0.54 (0.19, 1.52) | 0.243  | 0.11 (0.01, 0.83) | 0.0325 |
| CCI            |     |       |       |     |       |       |                   |        |                   |        |
| 0              | 297 | 26378 | 11.26 | 224 | 30544 | 7.33  | 0.65 (0.55, 0.77) | <0.001 | 0.57 (0.47, 0.68) | <0.001 |
| 1              | 69  | 3609  | 19.12 | 60  | 4502  | 13.33 | 0.71 (0.5, 1)     | 0.049  | 0.71 (0.49, 1.03) | 0.075  |
| ≥2             | 139 | 3325  | 41.80 | 105 | 4981  | 21.08 | 0.49 (0.38, 0.63) | <0.001 | 0.52 (0.4, 0.68)  | <0.001 |
| DCSI           |     |       |       |     |       |       |                   |        |                   |        |
| 0              | 131 | 13763 | 9.52  | 128 | 15353 | 8.34  | 0.88 (0.69, 1.12) | 0.2944 | 0.75 (0.58, 0.97) | 0.0284 |
| 1              | 83  | 7432  | 11.17 | 63  | 8470  | 7.44  | 0.68 (0.49, 0.94) | 0.0207 | 0.61 (0.43, 0.87) | 0.0054 |

---

|             |     |       |       |     |       |       |                   |        |                    |        |
|-------------|-----|-------|-------|-----|-------|-------|-------------------|--------|--------------------|--------|
| ≥2          | 291 | 12118 | 24.01 | 198 | 16204 | 12.22 | 0.5 (0.42, 0.6)   | <0.001 | 0.49 (0.4, 0.59)   | <0.001 |
| OAD numbers |     |       |       |     |       |       |                   |        |                    |        |
| 0-1         | 355 | 25824 | 13.75 | 313 | 31572 | 9.91  | 0.72 (0.62, 0.84) | <0.001 | 0.6 (0.51, 0.7)    | <0.001 |
| 2-3         | 143 | 6957  | 20.56 | 73  | 8233  | 8.87  | 0.44 (0.33, 0.58) | <0.001 | 0.45 (0.33, 0.6)   | <0.001 |
| >3          | 7   | 532   | 13.15 | 3   | 223   | 13.45 | 1.07 (0.28, 4.17) | 0.918  | 3.4 (0, 184559.31) | 0.8257 |
| Insulin     |     |       |       |     |       |       |                   |        |                    |        |
| No          | 294 | 21960 | 13.39 | 236 | 25564 | 9.23  | 0.69 (0.58, 0.82) | <0.001 | 0.6 (0.5, 0.72)    | <0.001 |
| Yes         | 211 | 11353 | 18.59 | 153 | 14463 | 10.58 | 0.56 (0.46, 0.69) | <0.001 | 0.53 (0.42, 0.65)  | <0.001 |

---

T2D: type 2 diabetes; PY: person-years; IR: incidence rate, per 1,000 person-years; cHR, crude hazard ratio; aHR: adjusted hazard ratio; CCI, Charlson Comorbidity Index; DCSI, Diabetes Complication Severity Index. OAD, oral antidiabetic drug.

aHR <sup>†</sup>: multivariable analysis including sex, age, comorbidities, medications as shown in Table 1.

**Table S6.** Hazard ratios (HRs), and 95% confidence intervals (CIs) for bacterial pneumonia among the sampled patients.

| Variables   | T2D without sulfonylureas |       |       | T2D with sulfonylureas |       |       | cHR (95% CI)      | p-value | aHR <sup>†</sup> (95% CI) | p-value |
|-------------|---------------------------|-------|-------|------------------------|-------|-------|-------------------|---------|---------------------------|---------|
|             | Event                     | PY    | IR    | Event                  | PY    | IR    |                   |         |                           |         |
| Sex         |                           |       |       |                        |       |       |                   |         |                           |         |
| Female      | 324                       | 16076 | 20.15 | 344                    | 18972 | 18.13 | 0.9 (0.78, 1.05)  | 0.1948  | 0.84 (0.72, 0.98)         | 0.0262  |
| Male        | 410                       | 15651 | 26.20 | 404                    | 19280 | 20.95 | 0.8 (0.69, 0.91)  | 0.0012  | 0.73 (0.63, 0.84)         | <0.001  |
| Age (years) |                           |       |       |                        |       |       |                   |         |                           |         |
| 40-49       | 45                        | 4742  | 9.49  | 52                     | 4424  | 11.75 | 1.23 (0.83, 1.84) | 0.3034  | 1 (0.64, 1.54)            | 0.9855  |
| 50-59       | 173                       | 12162 | 14.23 | 188                    | 14847 | 12.66 | 0.9 (0.73, 1.11)  | 0.32    | 0.83 (0.67, 1.03)         | 0.0887  |
| 60-59       | 236                       | 9248  | 25.52 | 232                    | 12097 | 19.18 | 0.76 (0.63, 0.91) | 0.0024  | 0.73 (0.61, 0.88)         | <0.001  |
| 70-80       | 280                       | 5575  | 50.23 | 276                    | 6884  | 40.09 | 0.77 (0.65, 0.91) | 0.0019  | 0.72 (0.61, 0.86)         | <0.001  |
| Obesity     |                           |       |       |                        |       |       |                   |         |                           |         |

|                |     |       |       |     |       |       |                   |        |                    |        |
|----------------|-----|-------|-------|-----|-------|-------|-------------------|--------|--------------------|--------|
| No             | 721 | 31027 | 23.24 | 742 | 37398 | 19.84 | 0.86 (0.77, 0.95) | 0.0028 | 0.79 (0.71, 0.88)  | <0.001 |
| Yes            | 13  | 700   | 18.58 | 6   | 854   | 7.03  | 0.36 (0.14, 0.95) | 0.0388 | 0.29 (0.08, 1.01)  | 0.0519 |
| Smoking status |     |       |       |     |       |       |                   |        |                    |        |
| No             | 727 | 31280 | 23.24 | 736 | 37738 | 19.50 | 0.84 (0.76, 0.93) | <0.001 | 0.78 (0.7, 0.87)   | <0.001 |
| Yes            | 7   | 447   | 15.66 | 12  | 514   | 23.35 | 1.46 (0.57, 3.71) | 0.4258 | 2.59 (0.49, 13.83) | 0.265  |
| CCI            |     |       |       |     |       |       |                   |        |                    |        |
| 0              | 488 | 25182 | 19.38 | 482 | 29310 | 16.44 | 0.85 (0.75, 0.97) | 0.0148 | 0.77 (0.67, 0.87)  | <0.001 |
| 1              | 98  | 3421  | 28.65 | 92  | 4275  | 21.52 | 0.74 (0.56, 0.98) | 0.0368 | 0.76 (0.56, 1.03)  | 0.0726 |
| ≥2             | 148 | 3125  | 47.37 | 174 | 4667  | 37.28 | 0.77 (0.61, 0.95) | 0.0177 | 0.86 (0.68, 1.08)  | 0.2025 |
| DCSI           |     |       |       |     |       |       |                   |        |                    |        |
| 0              | 211 | 13289 | 15.88 | 234 | 14890 | 15.71 | 1 (0.83, 1.2)     | 0.982  | 0.85 (0.7, 1.03)   | 0.0921 |
| 1              | 142 | 6986  | 20.33 | 137 | 8112  | 16.89 | 0.84 (0.66, 1.06) | 0.1429 | 0.76 (0.6, 0.97)   | 0.0279 |

---

|             |     |       |       |     |       |       |                   |        |                   |        |
|-------------|-----|-------|-------|-----|-------|-------|-------------------|--------|-------------------|--------|
| ≥2          | 381 | 11452 | 33.27 | 377 | 15250 | 24.72 | 0.74 (0.64, 0.85) | <0.001 | 0.74 (0.64, 0.86) | <0.001 |
| OAD numbers |     |       |       |     |       |       |                   |        |                   |        |
| 0-1         | 546 | 24598 | 22.20 | 582 | 30221 | 19.26 | 0.87 (0.77, 0.97) | 0.015  | 0.76 (0.67, 0.86) | <0.001 |
| 2-3         | 171 | 6637  | 25.77 | 163 | 7807  | 20.88 | 0.82 (0.66, 1.02) | 0.0803 | 0.88 (0.71, 1.11) | 0.2809 |
| >3          | 17  | 493   | 34.51 | 3   | 224   | 13.39 | 0.39 (0.11, 1.33) | 0.1313 | 0.05 (0, 0.61)    | 0.0199 |
| Insulin     |     |       |       |     |       |       |                   |        |                   |        |
| No          | 463 | 20830 | 22.23 | 434 | 24618 | 17.63 | 0.8 (0.7, 0.91)   | <0.001 | 0.71 (0.62, 0.81) | <0.001 |
| Yes         | 271 | 10897 | 24.87 | 314 | 13634 | 23.03 | 0.92 (0.78, 1.08) | 0.3091 | 0.91 (0.77, 1.08) | 0.2784 |

---

T2D: type 2 diabetes; PY: person-years; IR: incidence rate, per 1,000 person-years; cHR, crude hazard ratio; aHR: adjusted hazard ratio; CCI, Charlson Comorbidity Index; DCSI, Diabetes Complication Severity Index. OAD, oral antidiabetic drug.

aHR <sup>†</sup>: multivariable analysis including sex, age, comorbidities, medications as shown in Table 1.
